# Supplementary material
Source: Elsevier journal article supplement (https://comptes-rendus.academie-sciences.fr/chimie/article/10.1016/j.crci.2006.06.014/file/attach/mmc1.pdf)

Spectre infrarouge de  $Me_4NPhCO_2SnPh_3Cl$

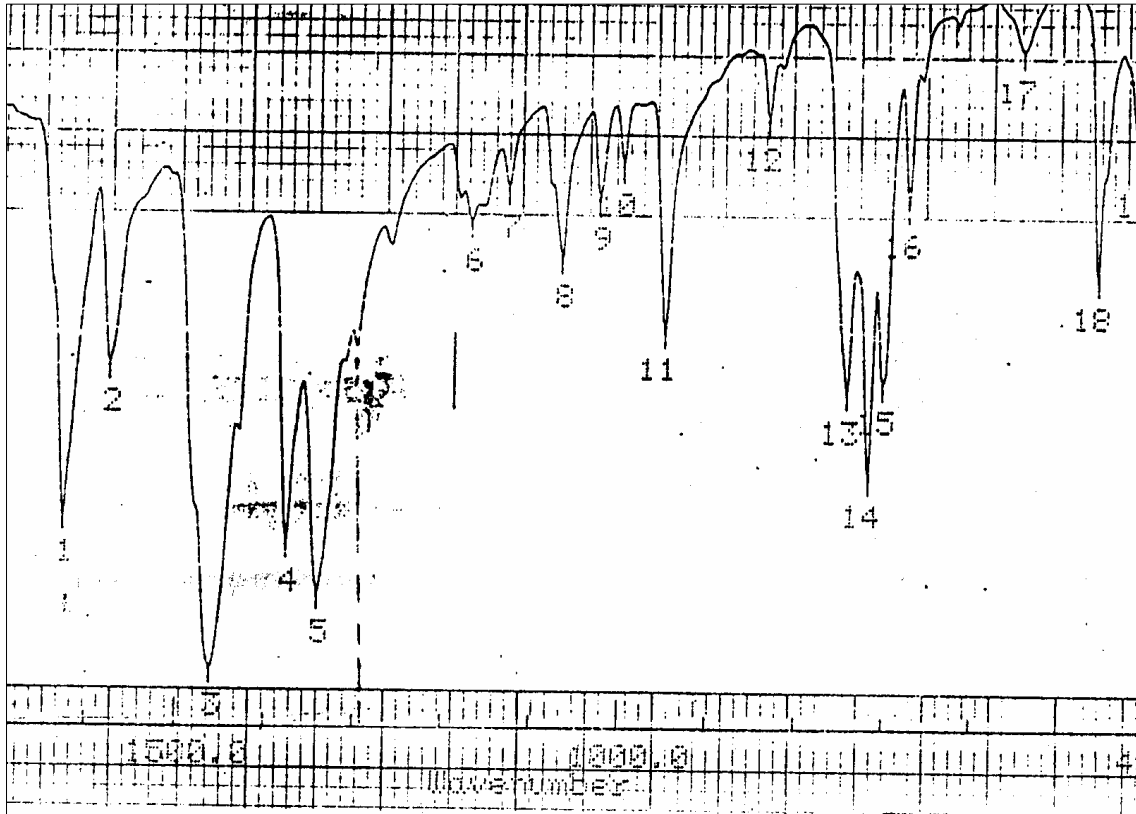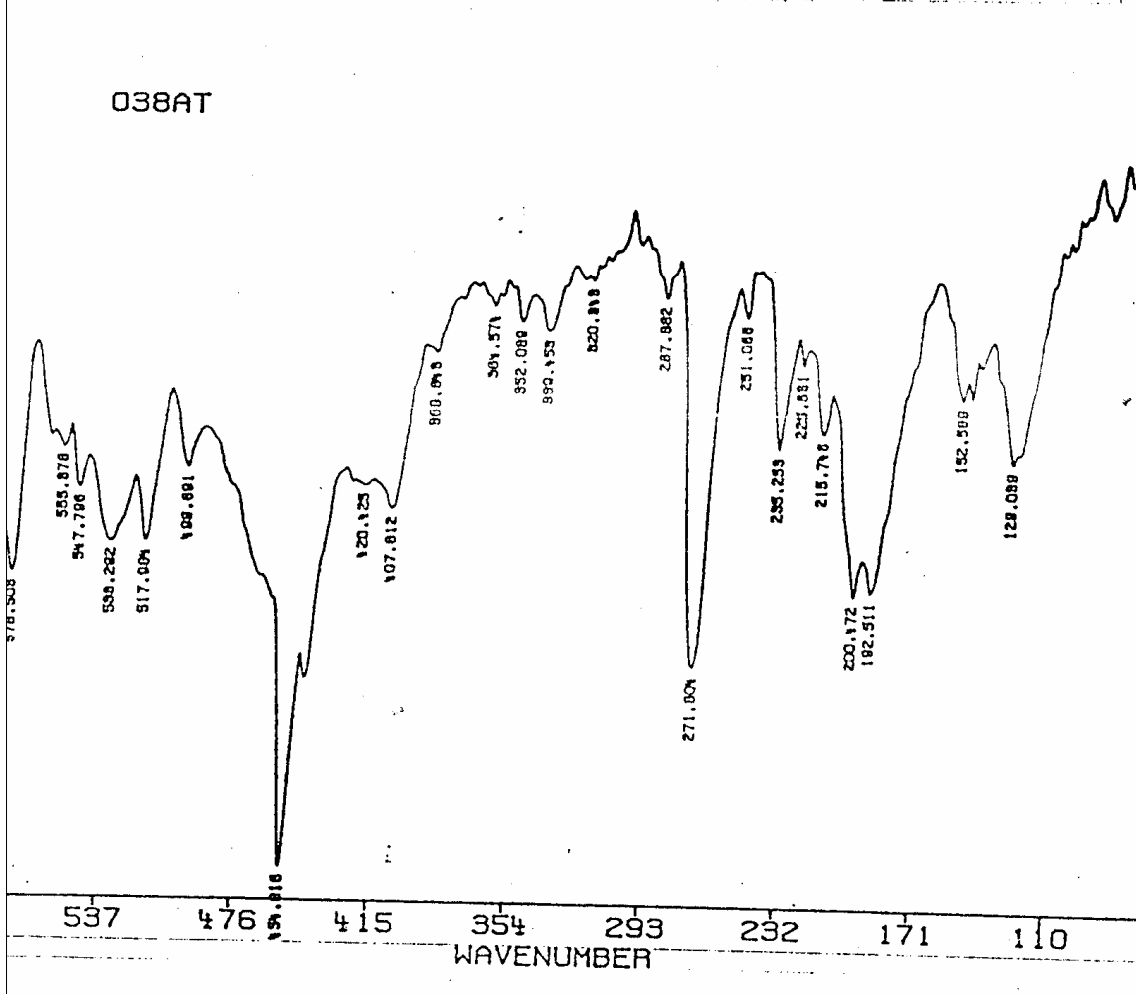

Spectre infrarouge de  $\text{Me}_4\text{NPhCO}_2 \cdot 2 \text{SnPh}_3\text{Cl}$

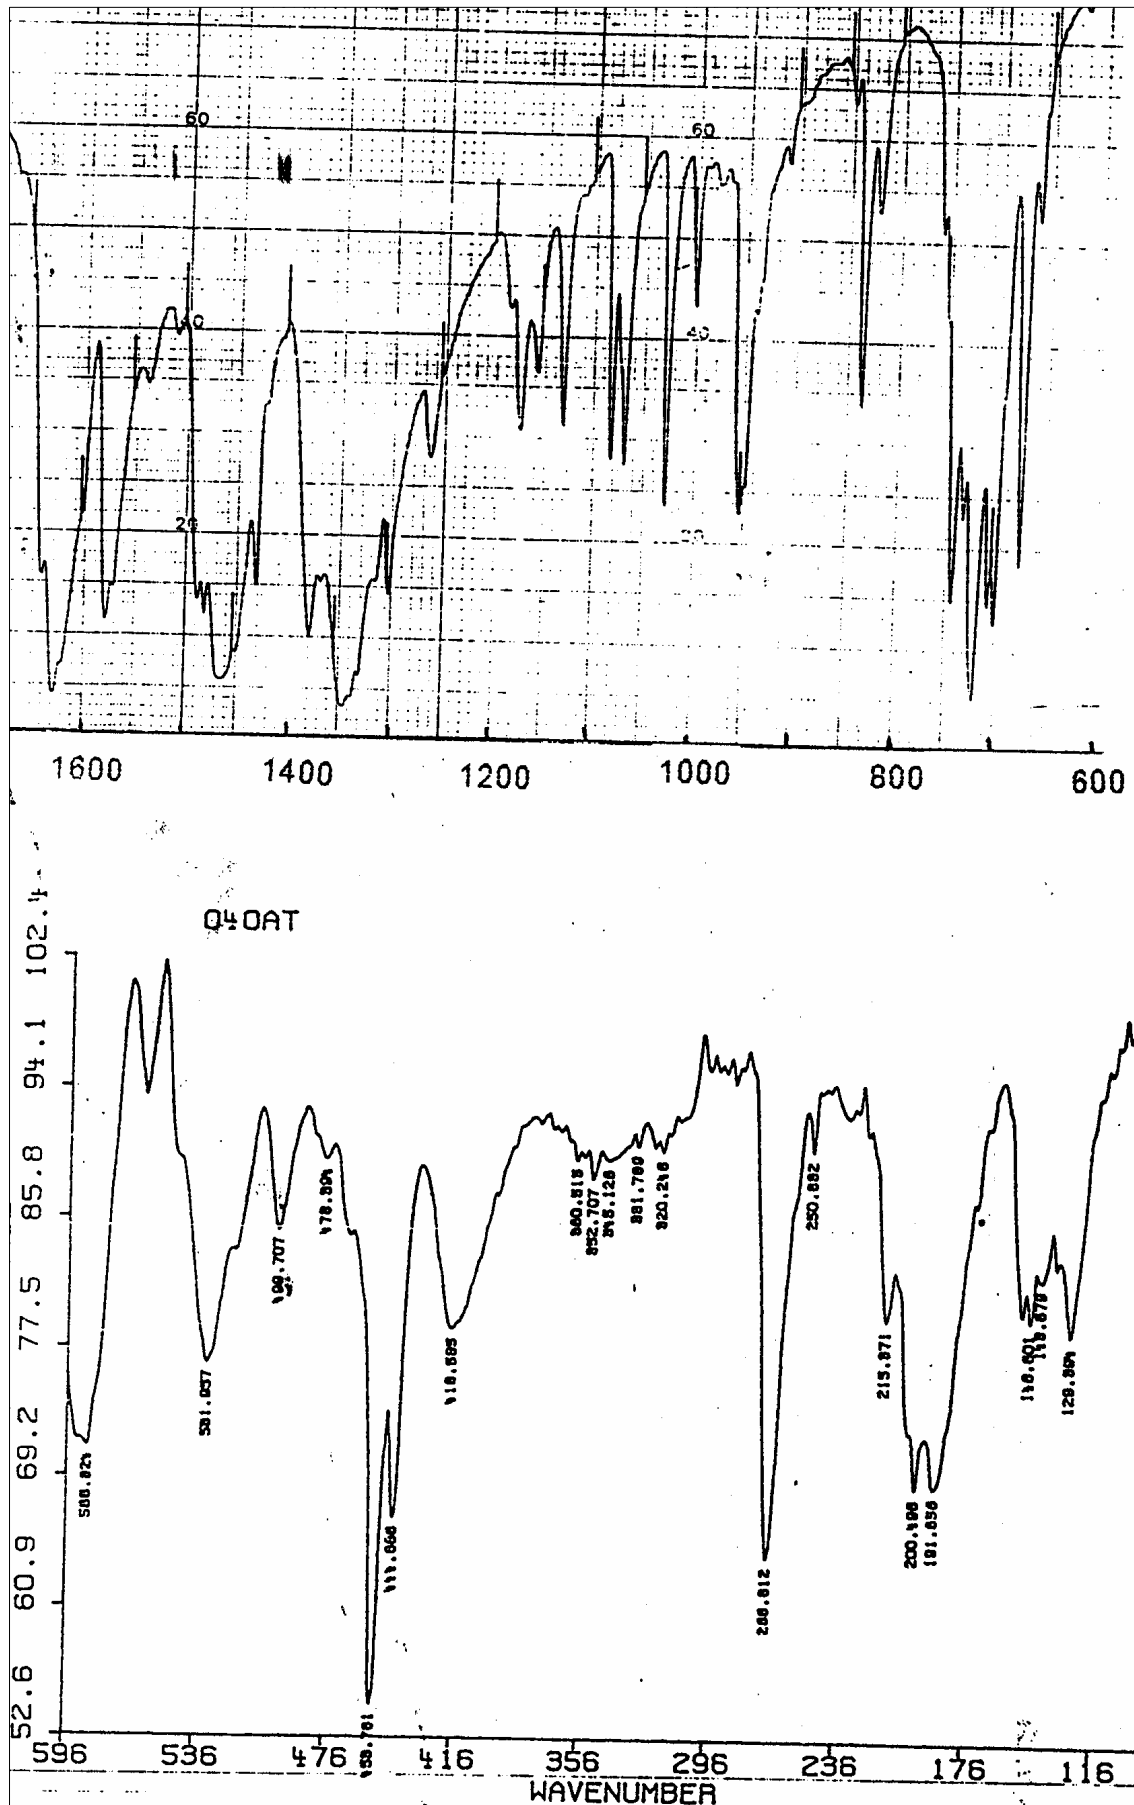

*Spectre infrarouge de  $\text{Ph}_4\text{P}\cdot\text{PhCO}_2\text{SnPh}_3\text{Cl}$*

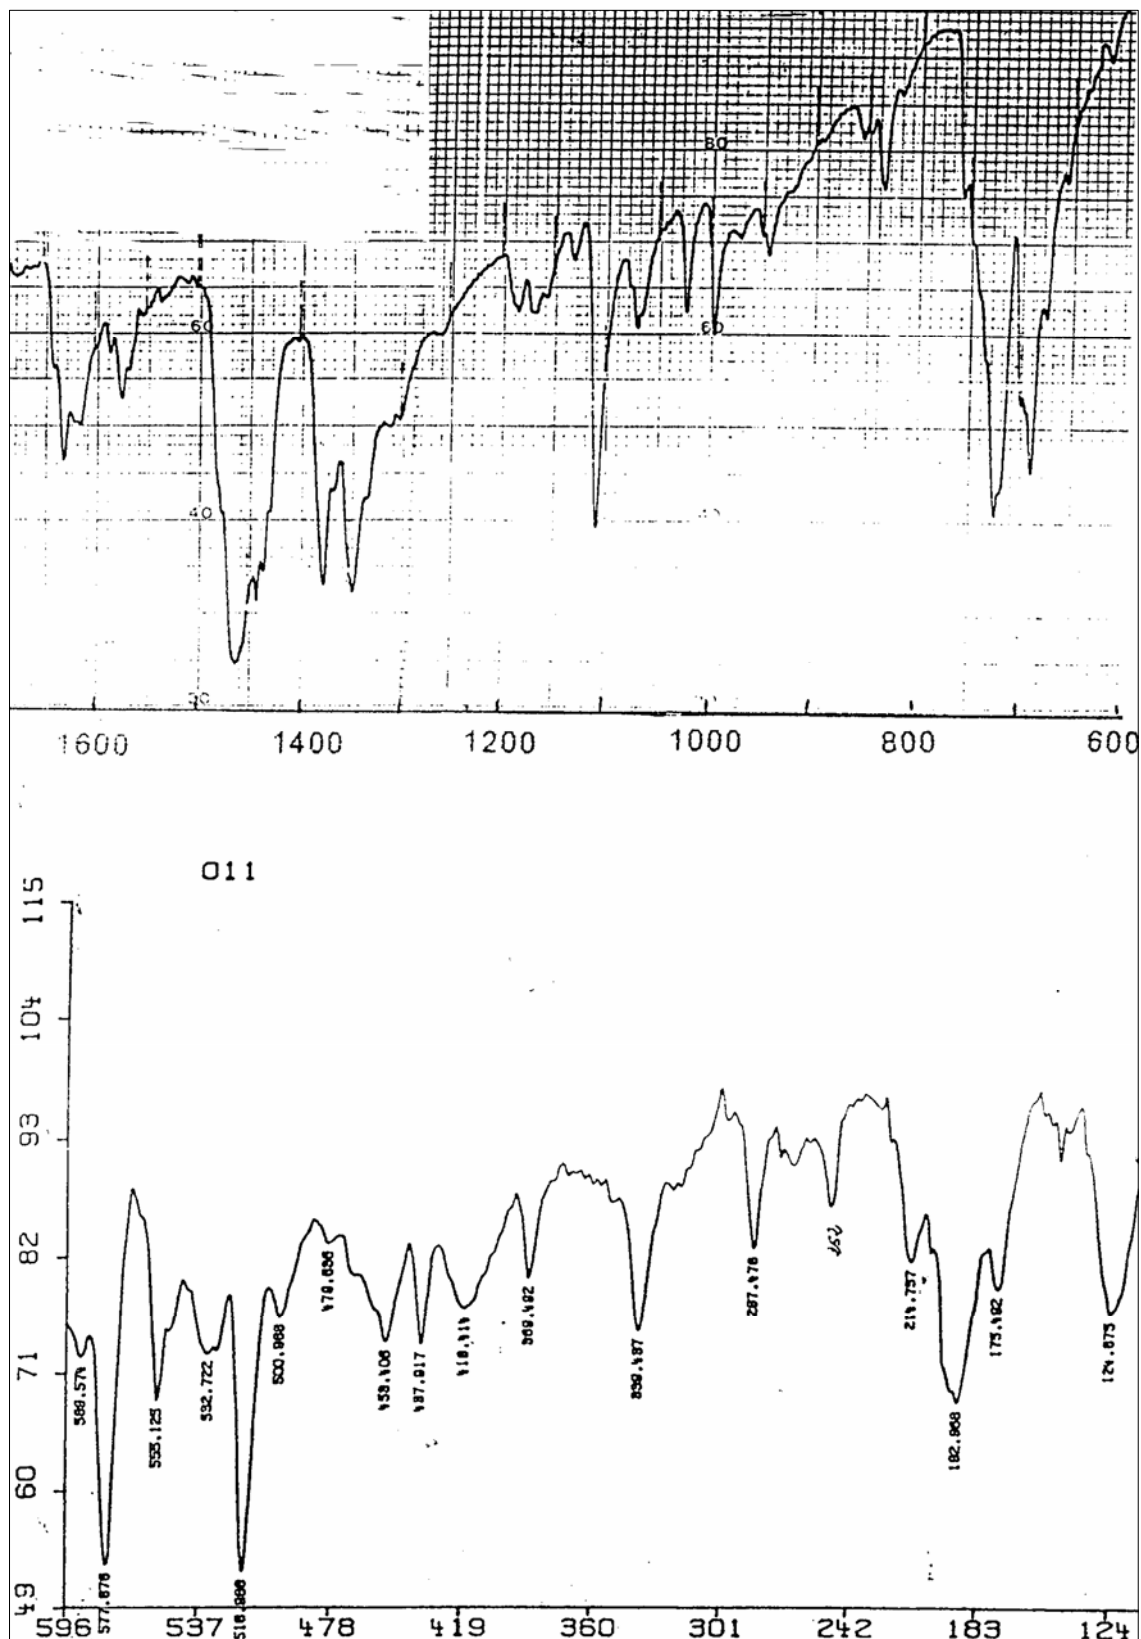

Supplement: mmc1 [file mmc1.pdf]
